# Supplementary material for: Integrated PPI- and WGCNA-Retrieval of Hub Gene Signatures Shared Between Barrett's Esophagus and Esophageal Adenocarcinoma
Source: PubMed Central journal article supplement (PMC7438937; doi:10.3389/fphar.2020.00881), 2020-07-31
Supplement: DataSheet_1.pdf [file DataSheet_1.pdf]

*Supplementary Material*

1.1 Supplementary Figures

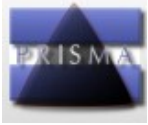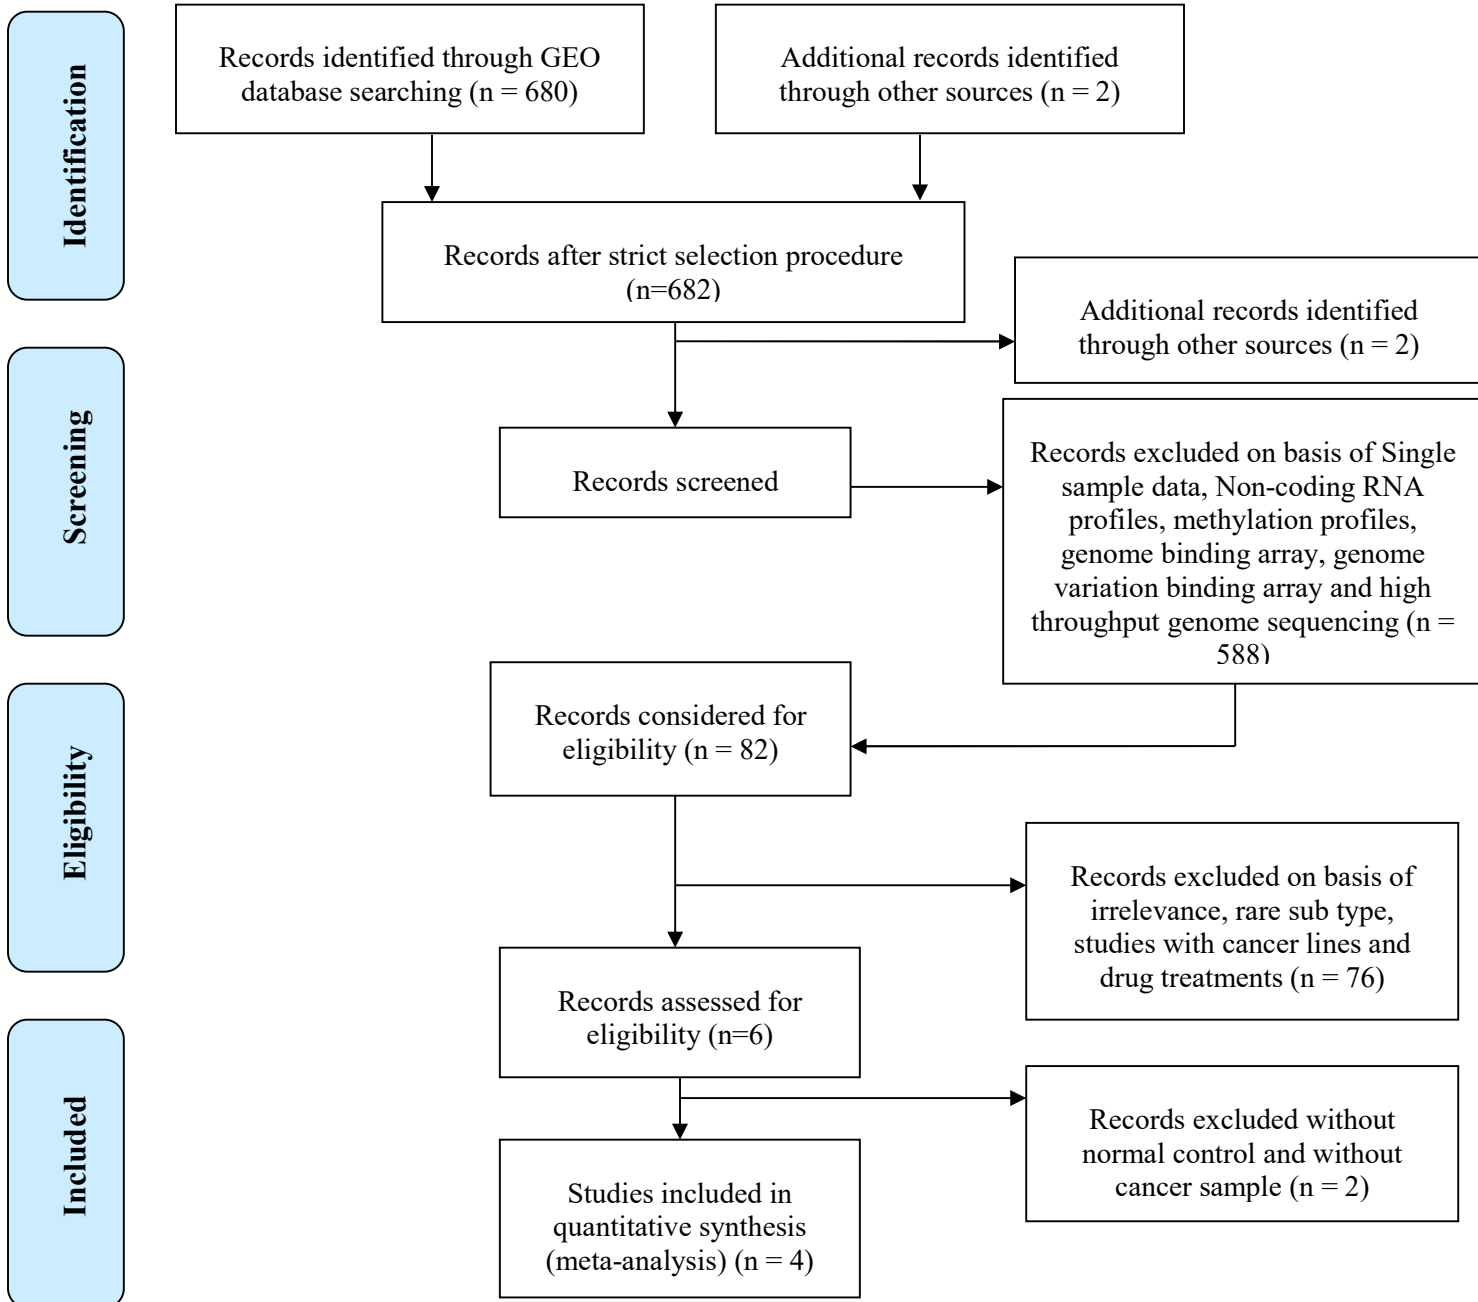

**Supplementary Figure 1.** PRISMA flow chart of the microarray meta-analysis. BE and EAC related GEO datasets eligible selection.

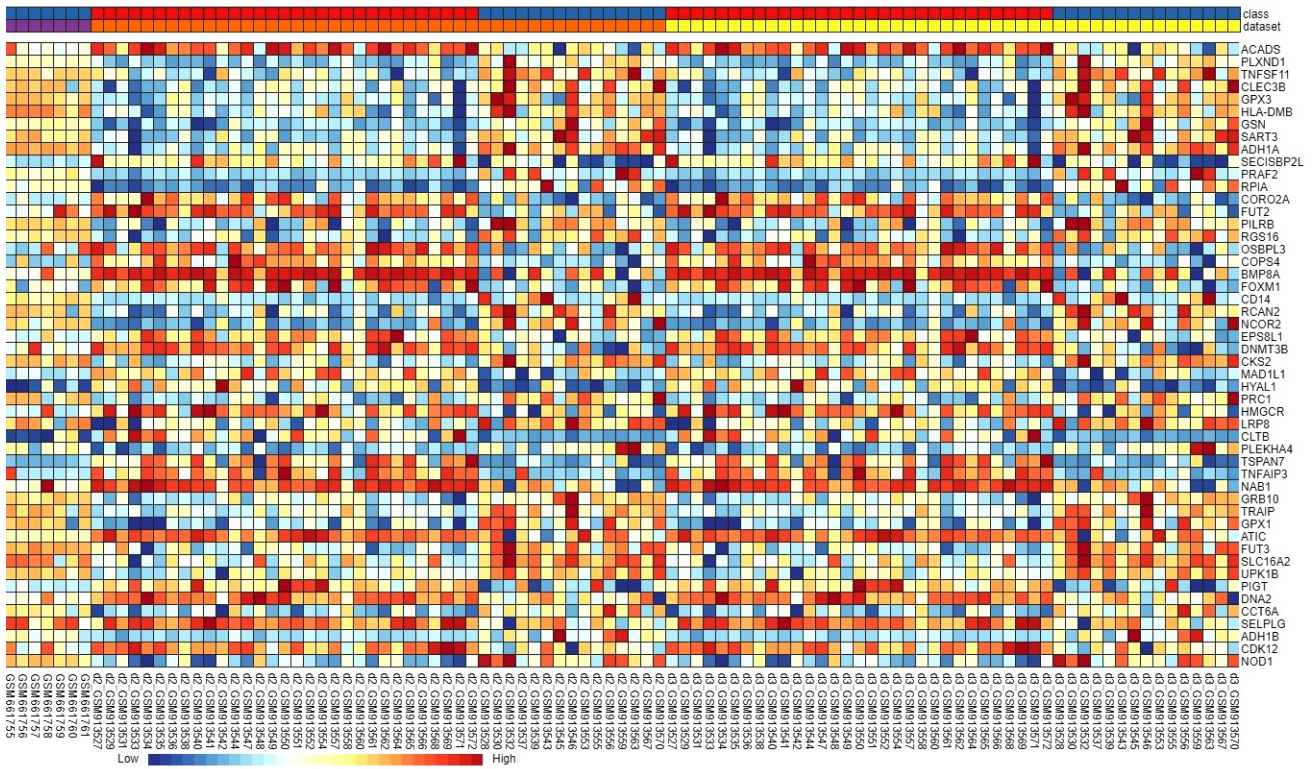

**Supplementary Figure 2.** Heatmap clustering of DEGs. Major DEGs across all the datasets were represented in red, orange, and yellow in color in a heatmap. Gray indicates that the respective gene is not present in the gene list

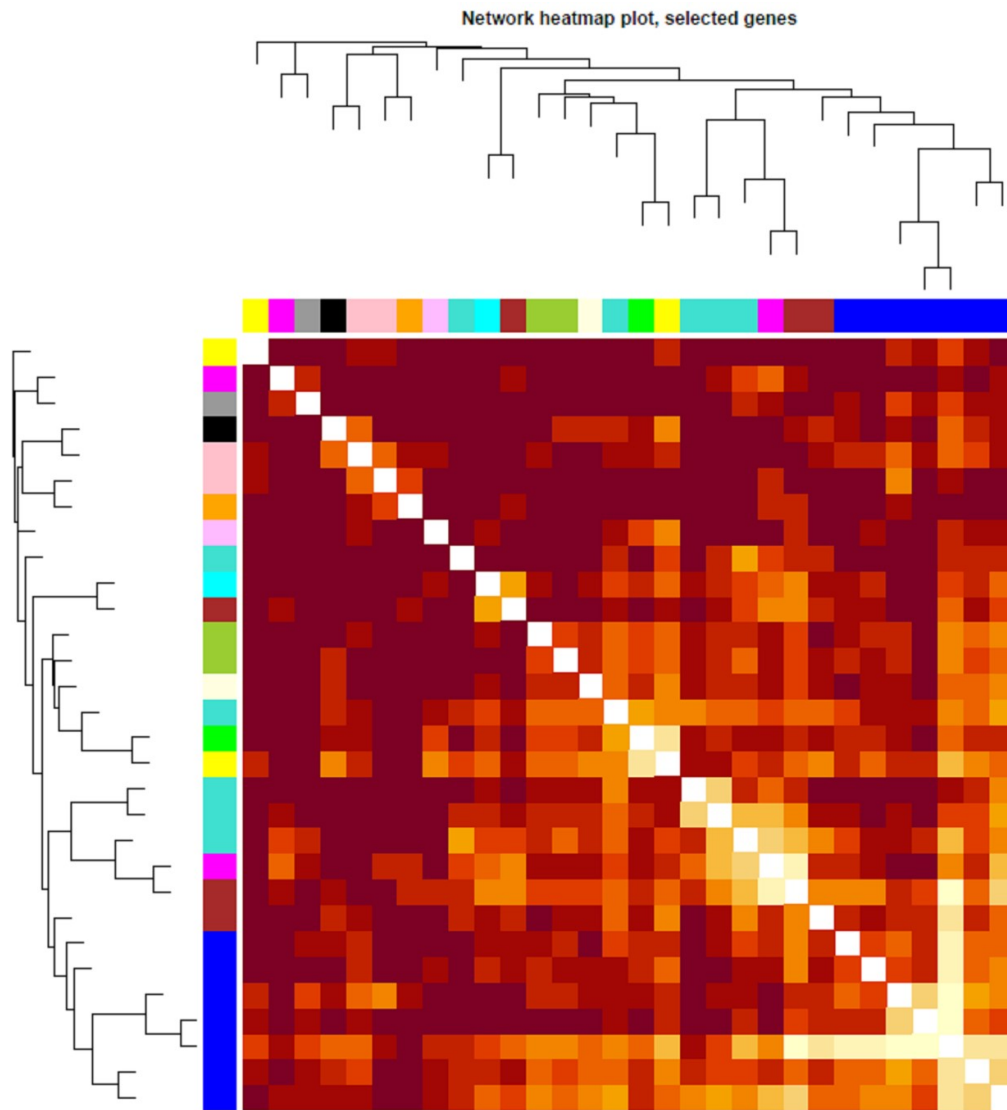

**Supplementary Figure 3.** Visualizing the gene network using a heatmap plot. The heatmap depicts the Topological Overlap Matrix (TOM) among all genes in the analysis. Light color represents low overlap and the progressively darker red color represents a higher overlap. Blocks of darker colors along the diagonal are the modules. The gene dendrogram and module assignment are also shown along the left side and the top.

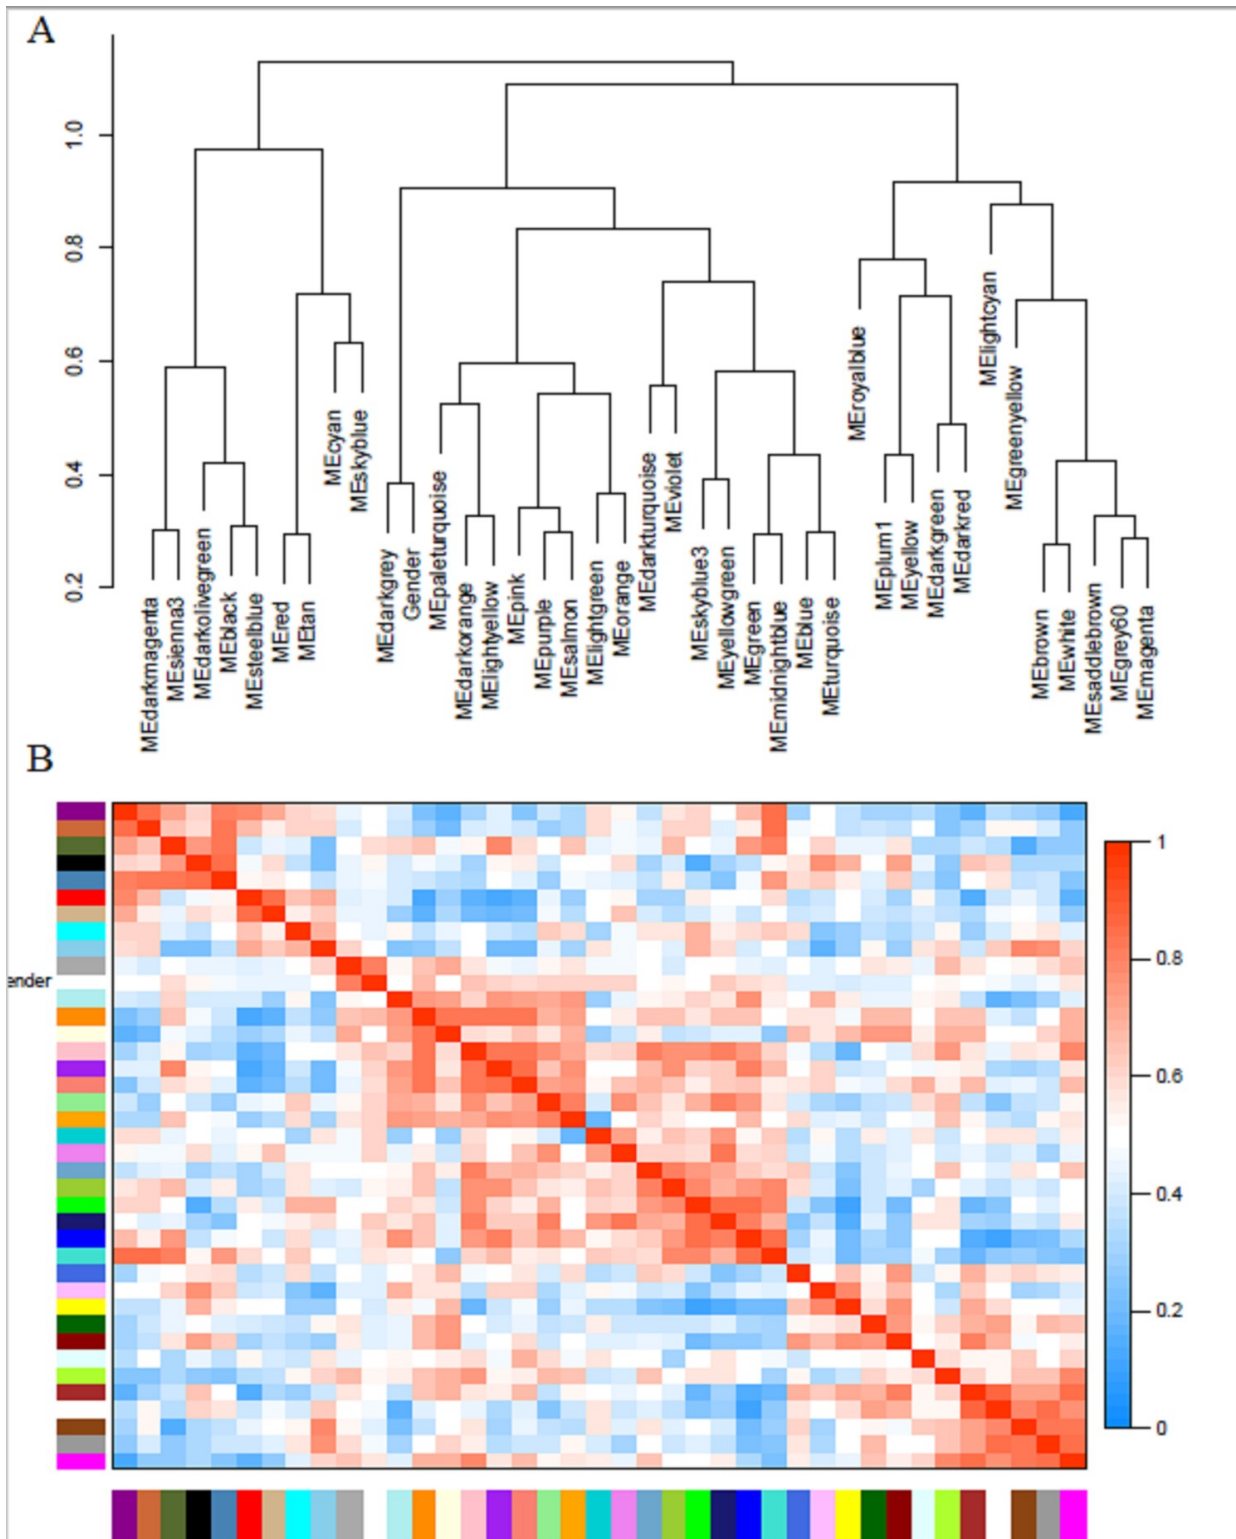

**Supplementary Figure 4.** Visualization of the eigengene network representing the relationships among the modules and the clinical trait weight. Panel (A) shows a hierarchical clustering dendrogram of the eigengenes in which the dissimilarity of eigengenes  $E_i, E_j$  is given by  $1 - \text{cor}(E_i; E_j)$ . The heatmap in panel (B) shows the eigengene adjacency  $A_{ij} = (1 + \text{cor}(E_i; E_j))/2$ .

## 1.2 Supplementary Tables

**Supplementary Table 1.** WGCNA module genes

| Gene ID | Gene Name                                            | WGCNA    |
|---------|------------------------------------------------------|----------|
| 51573   | glycerophosphodiester phosphodiesterase 1(GDE1)      | GDE1     |
| 55231   | coiled-coil domain containing 87(CCDC87)             | CCDC87   |
| 79800   | calcium responsive transcription factor(CARF)        | CARF     |
| 4496    | metallothionein 1H(MT1H)                             | MT1H     |
| 4493    | metallothionein 1E(MT1E)                             | MT1E     |
| 8416    | annexin A9(ANXA9)                                    | ANXA9    |
| 645745  | metallothionein 1H-like 1(MT1HL1)                    | MT1HL1   |
| 4494    | metallothionein 1F(MT1F)                             | MT1F     |
| 1314    | coatomer protein complex subunit alpha(COPA)         | COPA     |
| 1416    | crystallin beta B2 pseudogene 1(CRYBB2P1)            | CRYBB2P1 |
| 5375    | peripheral myelin protein 2(PMP2)                    | PMP2     |
| 51086   | TNNI3 interacting kinase(TNNI3K)                     | TNNI3K   |
| 79088   | zinc finger protein 426(ZNF426)                      | ZNF426   |
| 8323    | frizzled class receptor 6(FZD6)                      | FZD6     |
| 3485    | insulin like growth factor binding protein 2(IGFBP2) | IGFBP2   |
| 22800   | related RAS viral (r-ras) oncogene homolog 2(RRAS2)  | RRAS2    |
| 5745    | parathyroid hormone 1 receptor(PTH1R)                | PTH1R    |
| 4213    | Meishomeobox 3 pseudogene 1(MEIS3P1)                 | MEIS3P1  |
| 23780   | apolipoprotein L2(APOL2)                             | APOL2    |
| 55853   | IDI2 antisense RNA 1(IDI2-AS1)                       | IDI2-AS1 |
| 85865   | GTP binding protein 10(GTPBP10)                      | GTPBP10  |
| 375035  | SFT2 domain containing 2(SFT2D2)                     | SFT2D2   |
| 4884    | neuronal pentraxin 1(NPTX1)                          | NPTX1    |
| 4893    | neuroblastoma RAS viral oncogene homolog(NRAS)       | NRAS     |
| 8725    | URI1, prefoldin like chaperone(URI1)                 | URI1     |
| 4502    | metallothionein 2A(MT2A)                             | MT2A     |
| 2023    | enolase 1(ENO1)                                      | ENO1     |
| 4501    | metallothionein 1X(MT1X)                             | MT1X     |
| 4499    | metallothionein 1M(MT1M)                             | MT1M     |
| 29907   | sorting nexin 15(SNX15)                              | SNX15    |
| 1457    | casein kinase 2 alpha 1(CSNK2A1)                     | CSNK2A1  |
| 10321   | cysteine rich secretory protein 3(CRISP3)            | CRISP3   |
| 23530   | nicotinamide nucleotide transhydrogenase(NNT)        | NNT      |
| 166647  | adhesion G protein-coupled receptor A3(ADGRA3)       | ADGRA3   |
| 51398   | WD repeat domain 83 opposite strand(WDR83OS)         | WDR83OS  |
| 3840    | karyopherin subunit alpha 4(KPNA4)                   | KPNA4    |
| 25771   | TBC1 domain family member 22A(TBC1D22A)              | TBC1D22A |
| 10085   | EGF like repeats and discoidin domains 3(EDIL3)      | EDIL3    |
| 6470    | serine hydroxymethyltransferase 1(SHMT1)             | SHMT1    |
| 54682   | MANSC domain containing 1(MANSC1)                    | MANSC1   |
| 51298   | theg spermatid protein(THEG)                         | THEG     |
| 9991    | polypyrimidine tract binding protein 3(PTBP3)        | PTBP3    |

|        |                                                                                                       |            |
|--------|-------------------------------------------------------------------------------------------------------|------------|
| 10313  | reticulon 3(RTN3)                                                                                     | RTN3       |
| 3839   | karyopherin subunit alpha 3(KPNA3)                                                                    | KPNA3      |
| 5245   | prohibitin(PHB)                                                                                       | PHB        |
| 10492  | synaptotagmin binding cytoplasmic RNA interacting protein(SYNCRIP)                                    | SYNCRIP    |
| 3835   | kinesin family member 22(KIF22)                                                                       | KIF22      |
| 10210  | TOP1 binding arginine/serine rich protein(TOPORS)                                                     | TOPORS     |
| 9889   | zinc finger BED-type containing 4(ZBED4)                                                              | ZBED4      |
| 6382   | syndecan 1(SDC1)                                                                                      | SDC1       |
| 27291  | R3H domain and coiled-coil containing 1 like(R3HCC1L)                                                 | R3HCC1L    |
| 10598  | activator of Hsp90 ATPase activity 1(AHSA1)                                                           | AHSA1      |
| 2969   | general transcription factor Iii(GTF2I)                                                               | GTF2I      |
| 10243  | gephyrin(GPHN)                                                                                        | GPHN       |
| 3627   | C-X-C motif chemokine ligand 10(CXCL10)                                                               | CXCL10     |
| 55787  | taxilin gamma(TXLNG)                                                                                  | TXLNG      |
| 9071   | claudin 10(CLDN10)                                                                                    | CLDN10     |
| 10850  | C-C motif chemokine ligand 27(CCL27)                                                                  | CCL27      |
| 26298  | ETS homologous factor(EHF)                                                                            | EHF        |
| 8836   | gamma-glutamyl hydrolase(GGH)                                                                         | GGH        |
| 55334  | solute carrier family 39 member 9(SLC39A9)                                                            | SLC39A9    |
| 26030  | pleckstrin homology and RhoGEF domain containing G3(PLEKHG3)                                          | PLEKHG3    |
| 10057  | ATP binding cassette subfamily C member 5(ABCC5)                                                      | ABCC5      |
| 10963  | stress induced phosphoprotein 1(STIP1)                                                                | STIP1      |
| 55891  | lens epithelial protein(LENEP)                                                                        | LENEP      |
| 23366  | KIAA0895(KIAA0895)                                                                                    | KIAA0895   |
| 56898  | 3-hydroxybutyrate dehydrogenase, type 2(BDH2)                                                         | BDH2       |
| 1E+08  | TOPORS antisense RNA 1(TOPORS-AS1)                                                                    | TOPORS-AS1 |
| 23682  | RAB38, member RAS oncogene family(RAB38)                                                              | RAB38      |
| 6192   | ribosomal protein S4, Y-linked 1(RPS4Y1)                                                              | RPS4Y1     |
| 3957   | galectin 2(LGALS2)                                                                                    | LGALS2     |
| 51124  | immediate early response 3 interacting protein 1(IER3IP1)                                             | IER3IP1    |
| 2561   | gamma-aminobutyric acid type A receptor beta2 subunit(GABRB2)                                         | GABRB2     |
| 2359   | formyl peptide receptor 3(FPR3)                                                                       | FPR3       |
| 51557  | lengsin, lens protein with glutamine synthetase domain(LGSN)                                          | LGSN       |
| 1607   | diacylglycerol kinase beta(DGKB)                                                                      | DGKB       |
| 55258  | threonine synthase like 2(THNSL2)                                                                     | THNSL2     |
| 10362  | high mobility group 20B(HMG20B)                                                                       | HMG20B     |
| 4734   | neural precursor cell expressed, developmentally down-regulated 4, E3 ubiquitin protein ligase(NEDD4) | NEDD4      |
| 28959  | transmembrane protein 176B(TMEM176B)                                                                  | TMEM176B   |
| 7770   | zinc finger protein 227(ZNF227)                                                                       | ZNF227     |
| 246126 | taxilin gamma pseudogene, Y-linked(TXLNGY)                                                            | TXLNGY     |
| 57097  | poly(ADP-ribose) polymerase family member 11(PARP11)                                                  | PARP11     |
| 64963  | mitochondrial ribosomal protein S11(MRPS11)                                                           | MRPS11     |
| 9716   | aquarius intron-binding spliceosomal factor(AQR)                                                      | AQR        |
| 10773  | zinc finger and BTB domain containing 6(ZBTB6)                                                        | ZBTB6      |
| 10775  | POP4 homolog, ribonuclease P/MRP subunit(POP4)                                                        | POP4       |
| 57194  | ATPase phospholipid transporting 10A (putative)(ATP10A)                                               | ATP10A     |

|       |                                                               |          |
|-------|---------------------------------------------------------------|----------|
| 5304  | prolactin induced protein(PIP)                                | PIP      |
| 57466 | SR-related CTD associated factor 4(SCAF4)                     | SCAF4    |
| 48    | aconitase 1(ACO1)                                             | ACO1     |
| 11212 | proline synthetasecotranscribed homolog (bacterial)(PROSC)    | PROSC    |
| 4670  | heterogeneous nuclear ribonucleoprotein M(HNRNPM)             | HNRNPM   |
| 3273  | histidine rich glycoprotein(HRG)                              | HRG      |
| 11118 | butyrophilin subfamily 3 member A2(BTN3A2)                    | BTN3A2   |
| 9087  | thymosin beta 4, Y-linked(TMSB4Y)                             | TMSB4Y   |
| 10842 | protein phosphatase 1 regulatory subunit 17(PPP1R17)          | PPP1R17  |
| 7761  | zinc finger protein 214(ZNF214)                               | ZNF214   |
| 4999  | origin recognition complex subunit 2(ORC2)                    | ORC2     |
| 10640 | exocyst complex component 5(EXOC5)                            | EXOC5    |
| 27159 | chitinase, acidic(CHIA)                                       | CHIA     |
| 7263  | thiosulfate sulfurtransferase(TST)                            | TST      |
| 54    | acid phosphatase 5, tartrate resistant(ACP5)                  | ACP5     |
| 55635 | DEP domain containing 1(DEPDC1)                               | DEPDC1   |
| 7290  | histone cell cycle regulator(HIRA)                            | HIRA     |
| 10130 | protein disulfide isomerase family A member 6(PDIA6)          | PDIA6    |
| 51003 | mediator complex subunit 31(MED31)                            | MED31    |
| 3149  | high mobility group box 3(HMGB3)                              | HMGB3    |
| 3146  | high mobility group box 1(HMGB1)                              | HMGB1    |
| 3005  | H1 histone family member 0(H1FO)                              | H1FO     |
| 5161  | pyruvate dehydrogenase (lipoamide) alpha 2(PDHA2)             | PDHA2    |
| 5019  | 3-oxoacid CoA-transferase 1(OXCT1)                            | OXCT1    |
| 9141  | programmed cell death 5(PDCD5)                                | PDCD5    |
| 1387  | CREB binding protein(CREBBP)                                  | CREBBP   |
| 54708 | membrane associated ring-CH-type finger 5(MARCH5)             | MAR      |
| 54810 | GIPC PDZ domain containing family member 2(GIPC2)             | GIPC2    |
| 23302 | WSC domain containing 1(WSCD1)                                | WSCD1    |
| 55028 | chromosome 17 open reading frame 80(C17orf80)                 | C17ORF80 |
| 4314  | matrix metalloproteinase 3(MMP3)                              | MMP3     |
| 4312  | matrix metalloproteinase 1(MMP1)                              | MMP1     |
| 4291  | myeloid leukemia factor 1(MLF1)                               | MLF1     |
| 1385  | cAMP responsive element binding protein 1(CREB1)              | CREB1    |
| 56851 | ER membrane protein complex subunit 7(EMC7)                   | EMC7     |
| 54922 | Ras interacting protein 1(RASIP1)                             | RASIP1   |
| 26355 | family with sequence similarity 162 member A(FAM162A)         | FAM162A  |
| 8295  | transformation/transcription domain associated protein(TRRAP) | TRRAP    |
| 10525 | hypoxia up-regulated 1(HYOU1)                                 | HYOU1    |
| 26280 | interleukin 1 receptor accessory protein like 2(IL1RAPL2)     | IL1RAPL2 |
| 4023  | lipoprotein lipase(LPL)                                       | LPL      |
| 2785  | G protein subunit gamma 3(GNG3)                               | GNG3     |
| 28999 | Kruppel like factor 15(KLF15)                                 | KLF15    |
| 9774  | BCL2 associated transcription factor 1(BCLAF1)                | BCLAF1   |
| 10279 | protease, serine 16(PRSS16)                                   | PRSS16   |
| 3320  | heat shock protein 90 alpha family class A member 1(HSP90AA1) | HSP90AA1 |
| 4430  | myosin IB(MYO1B)                                              | MYO1B    |
| 1791  | DNA nucleotidylexotransferase(DNTT)                           | DNTT     |
| 4946  | ornithine decarboxylase antizyme 1(OAZ1)                      | OAZ1     |

|        |                                                                           |         |
|--------|---------------------------------------------------------------------------|---------|
| 60558  | GUF1 homolog, GTPase(GUF1)                                                | GUF1    |
| 1267   | 2',3'-cyclic nucleotide 3' phosphodiesterase(CNP)                         | CNP     |
| 23586  | DExD/H-box helicase 58(DDX58)                                             | DDX58   |
| 23587  | elongator acetyltransferase complex subunit 5(ELP5)                       | ELP5    |
| 5151   | phosphodiesterase 8A(PDE8A)                                               | PDE8A   |
| 9377   | cytochrome c oxidase subunit 5A(COX5A)                                    | COX5A   |
| 4014   | loricrin(LOR)                                                             | LOR     |
| 26057  | ankyrin repeat domain 17(ANKRD17)                                         | ANKRD17 |
| 4179   | CD46 molecule(CD46)                                                       | CD46    |
| 22865  | SLIT and NTRK like family member 3(SLITRK3)                               | SLITRK3 |
| 5158   | phosphodiesterase 6B(PDE6B)                                               | PDE6B   |
| 10686  | claudin 16(CLDN16)                                                        | CLDN16  |
| 291    | solute carrier family 25 member 4(SLC25A4)                                | SLC25A4 |
| 3329   | heat shock protein family D (Hsp60) member 1(HSPD1)                       | HSPD1   |
| 1397   | cysteine rich protein 2(CRIP2)                                            | CRIP2   |
| 995    | cell division cycle 25C(CDC25C)                                           | CDC25C  |
| 51319  | arginine and serine rich coiled-coil 1(RSRC1)                             | RSRC1   |
| 29766  | tropomodulin 3(TMOD3)                                                     | TMOD3   |
| 3231   | homeobox D1(HOXD1)                                                        | HOXD1   |
| 79184  | BRCA1/BRCA2-containing complex subunit 3(BRCC3)                           | BRCC3   |
| 79644  | steroid 5 alpha-reductase 3(SRD5A3)                                       | SRD5A3  |
| 26511  | cysteine rich hydrophobic domain 2(CHIC2)                                 | CHIC2   |
| 56672  | A-kinase interacting protein 1(AKIP1)                                     | AKIP1   |
| 642    | bleomycin hydrolase(BLMH)                                                 | BLMH    |
| 26121  | pre-mRNA processing factor 31(PRPF31)                                     | PRPF31  |
| 2911   | glutamate metabotropic receptor 1(GRM1)                                   | GRM1    |
| 23409  | sirtuin 4(SIRT4)                                                          | SIRT4   |
| 80143  | suppressor of IKBKE 1(SIKE1)                                              | SIKE1   |
| 9100   | ubiquitin specific peptidase 10(USP10)                                    | USP10   |
| 219595 | folate hydrolase 1B(FOLH1B)                                               | FOLH1B  |
| 3191   | heterogeneous nuclear ribonucleoprotein L(HNRNPL)                         | HNRNPL  |
| 29063  | zinc finger CCHC-type containing 4(ZCCHC4)                                | ZCCHC4  |
| 5887   | RAD23 homolog B, nucleotide excision repair protein(RAD23B)               | RAD23B  |
| 5264   | phytanoyl-CoA 2-hydroxylase(PHYH)                                         | PHYH    |
| 7018   | transferrin(TF)                                                           | TF      |
| 5885   | RAD21 cohesin complex component(RAD21)                                    | RAD21   |
| 79656  | BEN domain containing 5(BEND5)                                            | BEND5   |
| 11248  | neurexophilin 3(NXPH3)                                                    | NXPH3   |
| 6732   | SRSF protein kinase 1(SRPK1)                                              | SRPK1   |
| 26211  | olfactory receptor family 2 subfamily F member 1 (gene/pseudogene)(OR2F1) | OR2F1   |
| 7503   | X inactive specific transcript (non-protein coding)(XIST)                 | XIST    |
| 373    | tripartite motif containing 23(TRIM23)                                    | TRIM23  |
| 1660   | DExH-box helicase 9(DHX9)                                                 | DHX9    |
| 84900  | ring finger protein, transmembrane 2(RNFT2)                               | RNFT2   |
| 9113   | large tumor suppressor kinase 1(LATS1)                                    | LATS1   |
| 3183   | heterogeneous nuclear ribonucleoprotein C (C1/C2)(HNRNPC)                 | HNRNPC  |
| 353189 | solute carrier organic anion transporter family member                    | SLCO4C1 |



|       |                                                                       |         |
|-------|-----------------------------------------------------------------------|---------|
|       | 4C1(SLCO4C1)                                                          |         |
| 1E+08 | psoriasis associated non-protein coding RNA induced by stress(PRINS)  | PRINS   |
| 5594  | mitogen-activated protein kinase 1(MAPK1)                             | MAPK1   |
| 762   | carbonic anhydrase 4(CA4)                                             | CA4     |
| 1749  | distal-less homeobox 5(DLX5)                                          | DLX5    |
| 6338  | sodium channel epithelial 1 beta subunit(SCNN1B)                      | SCNN1B  |
| 363   | aquaporin 6(AQP6)                                                     | AQP6    |
| 3456  | interferon beta 1(IFNB1)                                              | IFNB1   |
| 9128  | pre-mRNA processing factor 4(PRPF4)                                   | PRPF4   |
| 64232 | membrane spanning 4-domains A5(MS4A5)                                 | MS4A5   |
| 5868  | RAB5A, member RAS oncogene family(RAB5A)                              | RAB54   |
| 79931 | TNFAIP3 interacting protein 3(TNIP3)                                  | TNIP3   |
| 753   | low density lipoprotein receptor class A domain containing 4(LDLRAD4) | LDLRAD4 |
| 22824 | heat shock protein family A (Hsp70) member 4 like(HSPA4L)             | HSPA4L  |
| 2923  | protein disulfide isomerase family A member 3(PDIA3)                  | PDIA3   |
| 4712  | NADH:ubiquinone oxidoreductase subunit B6(NDUFB6)                     | NDUFB6  |
| 2922  | gastrin releasing peptide(GRP)                                        | GRP     |
| 1964  | eukaryotic translation initiation factor 1A, X-linked(EIF1AX)         | EIF1AX  |
| 6857  | synaptotagmin 1(SYT1)                                                 | SYT1    |
| 9667  | scaffold attachment factor B2(SAFB2)                                  | SAFB2   |
| 51350 | keratin 76(KRT76)                                                     | KRT76   |
| 1677  | DNA fragmentation factor subunit beta(DFFB)                           | DFFB    |
| 91752 | zinc finger protein 804A(ZNF804A)                                     | ZNF804A |
| 54842 | major facilitator superfamily domain containing 6(MFSD6)              | MSFD6   |
| 6426  | serine and arginine rich splicing factor 1(SRSF1)                     | SRSF1   |
| 9128  | pre-mRNA processing factor 4(PRPF4)                                   | PRPF4   |
| 64232 | membrane spanning 4-domains A5(MS4A5)                                 | MS4A5   |
| 5868  | RAB5A, member RAS oncogene family(RAB5A)                              | RAB54   |
| 79931 | TNFAIP3 interacting protein 3(TNIP3)                                  | TNIP3   |
| 753   | low density lipoprotein receptor class A domain containing 4(LDLRAD4) | LDLRAD4 |
| 22824 | heat shock protein family A (Hsp70) member 4 like(HSPA4L)             | HSPA4L  |
| 2923  | protein disulfide isomerase family A member 3(PDIA3)                  | PDIA3   |
| 4712  | NADH:ubiquinone oxidoreductase subunit B6(NDUFB6)                     | NDUFB6  |
| 2922  | gastrin releasing peptide(GRP)                                        | GRP     |
| 1964  | eukaryotic translation initiation factor 1A, X-linked(EIF1AX)         | EIF1AX  |
| 6857  | synaptotagmin 1(SYT1)                                                 | SYT1    |
| 9667  | scaffold attachment factor B2(SAFB2)                                  | SAFB2   |
| 51350 | keratin 76(KRT76)                                                     | KRT76   |
| 1677  | DNA fragmentation factor subunit beta(DFFB)                           | DFFB    |
| 91752 | zinc finger protein 804A(ZNF804A)                                     | ZNF804A |
| 54842 | major facilitator superfamily domain containing 6(MFSD6)              | MSFD6   |
| 6426  | serine and arginine rich splicing factor 1(SRSF1)                     | SRSF1   |
